# Supplementary material for: Aerosol optical characteristics and their vertical distributions under enhanced haze pollution events: effect of the regional transport of different aerosol types over eastern China
Source: Copernicus journal article supplement (doi:10.5194/acp-18-2949-2018), 2018-03-01
Supplement: Supplementary file 1 [file acp-18-2949-2018-supplement.pdf]

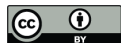

*Supplement of*

**Aerosol optical characteristics and their vertical distributions under enhanced haze pollution events: effect of the regional transport of different aerosol types over eastern China**

**Tianze Sun et al.**

*Correspondence to:* Huizheng Che (chehz@camscma.cn) and Xiangao Xia (xxa@mail.iap.ac.cn)

The copyright of individual parts of the supplement might differ from the CC BY 4.0 License.

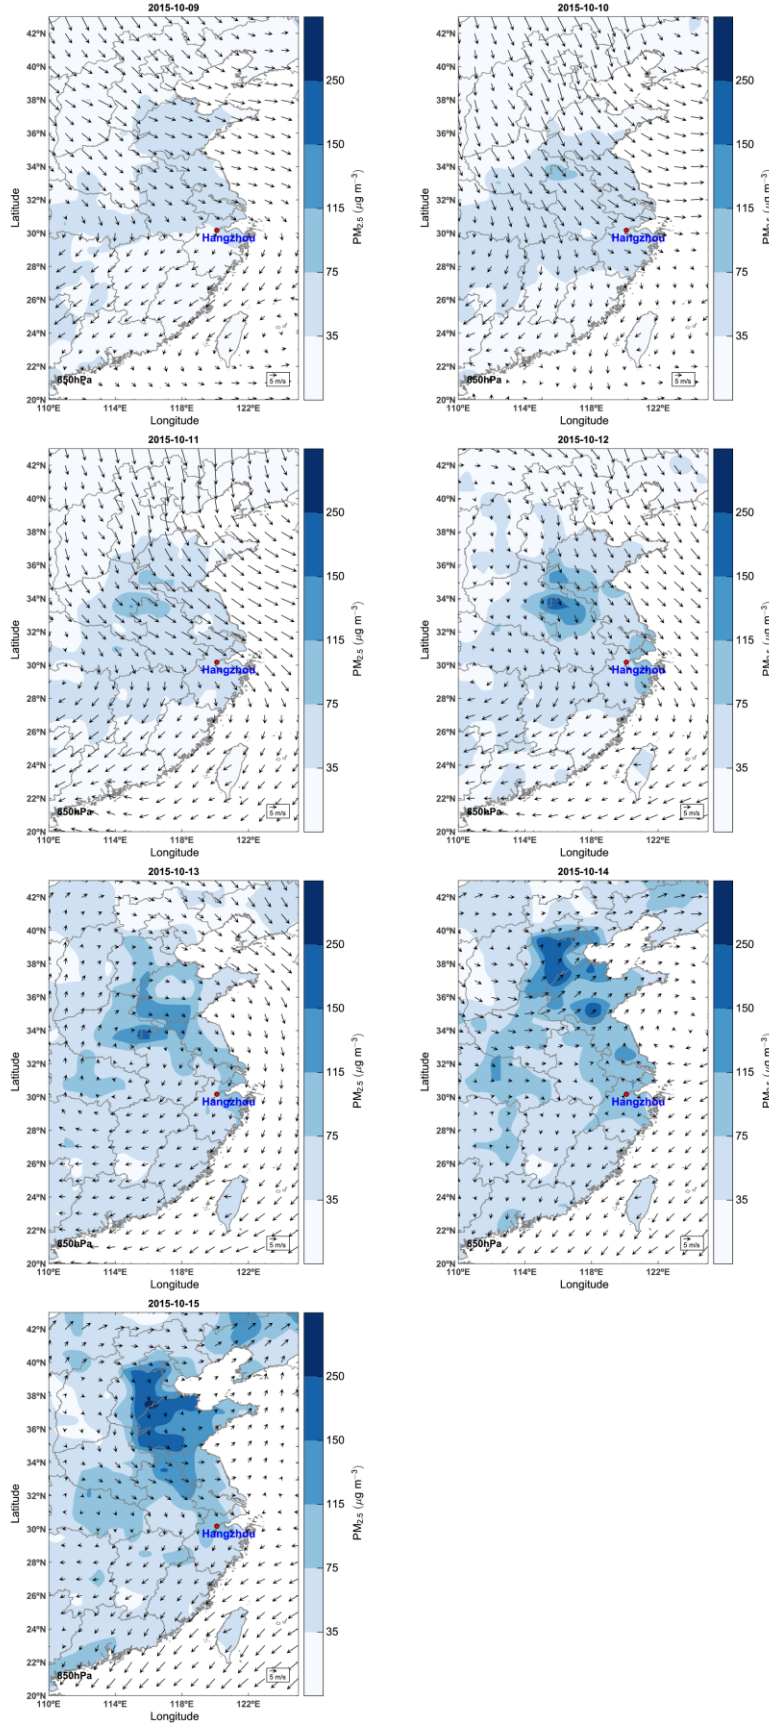

Figure S1. Daily averaged spatial distribution of PM<sub>2.5</sub> mass concentration and the wind field at 850hPa from ECMWF over eastern China during 09-15 October, 2015.

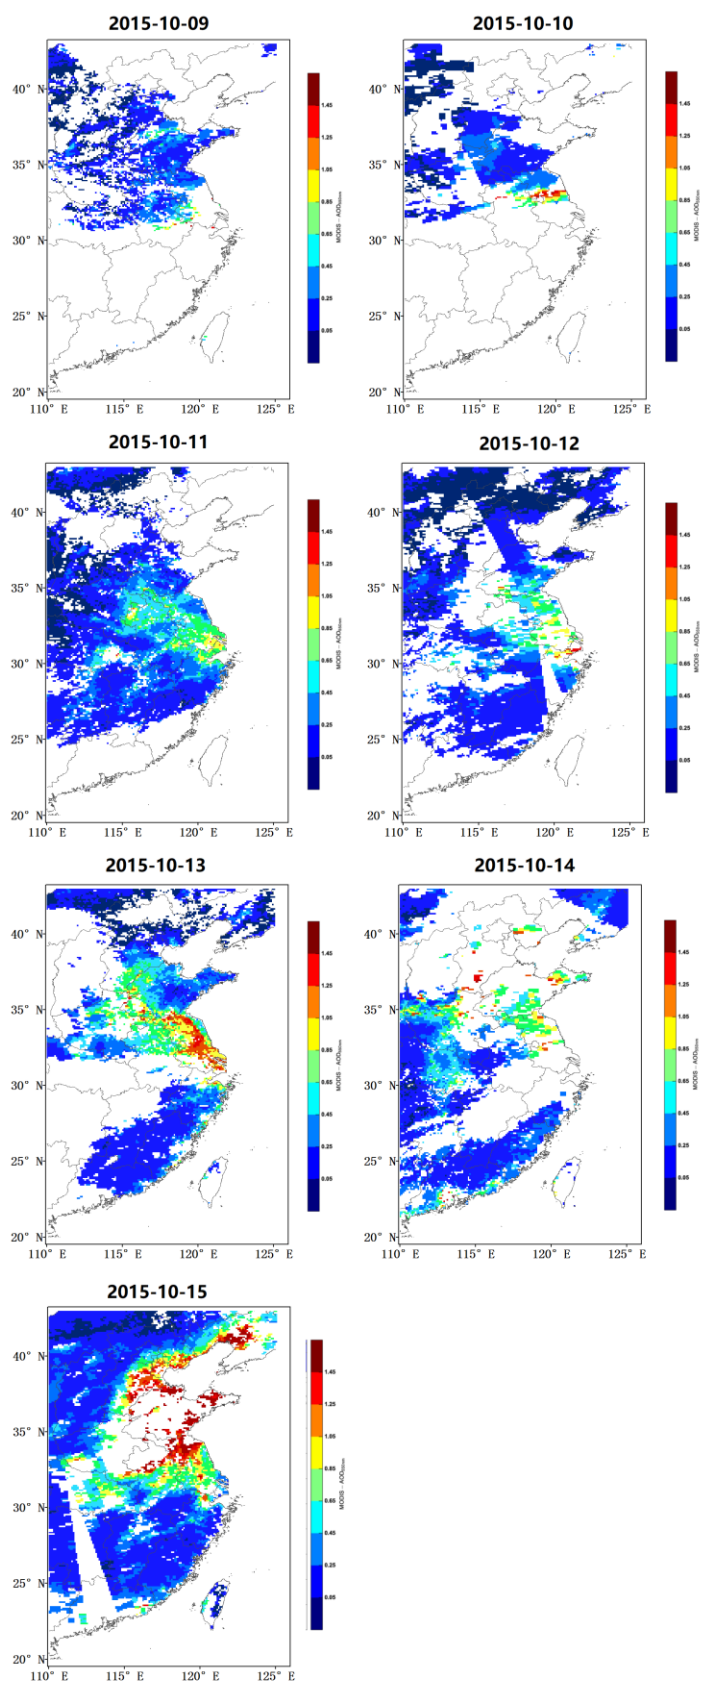

Figure S2. Daily averaged spatial distribution of AOD from MODIS, over eastern China during 09-15 October, 2015.

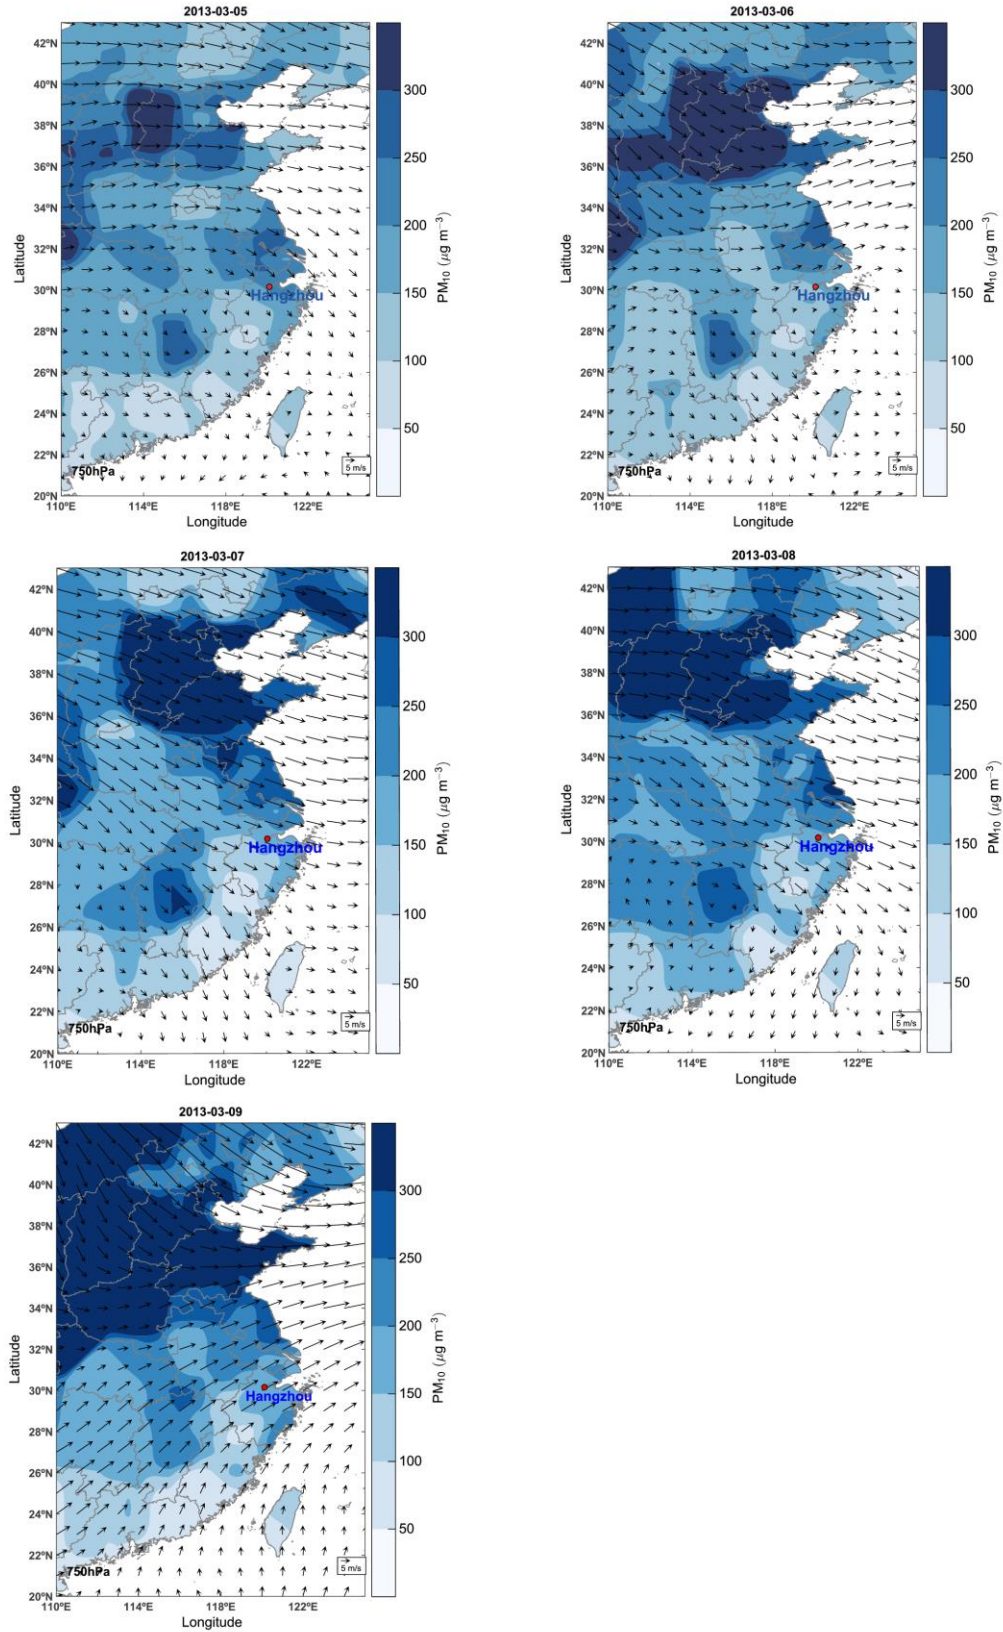

Figure S3. Daily averaged spatial distribution of PM<sub>10</sub> mass concentration and the wind field at 750hPa from ECMWF over eastern China, during 05-09 March, 2013.



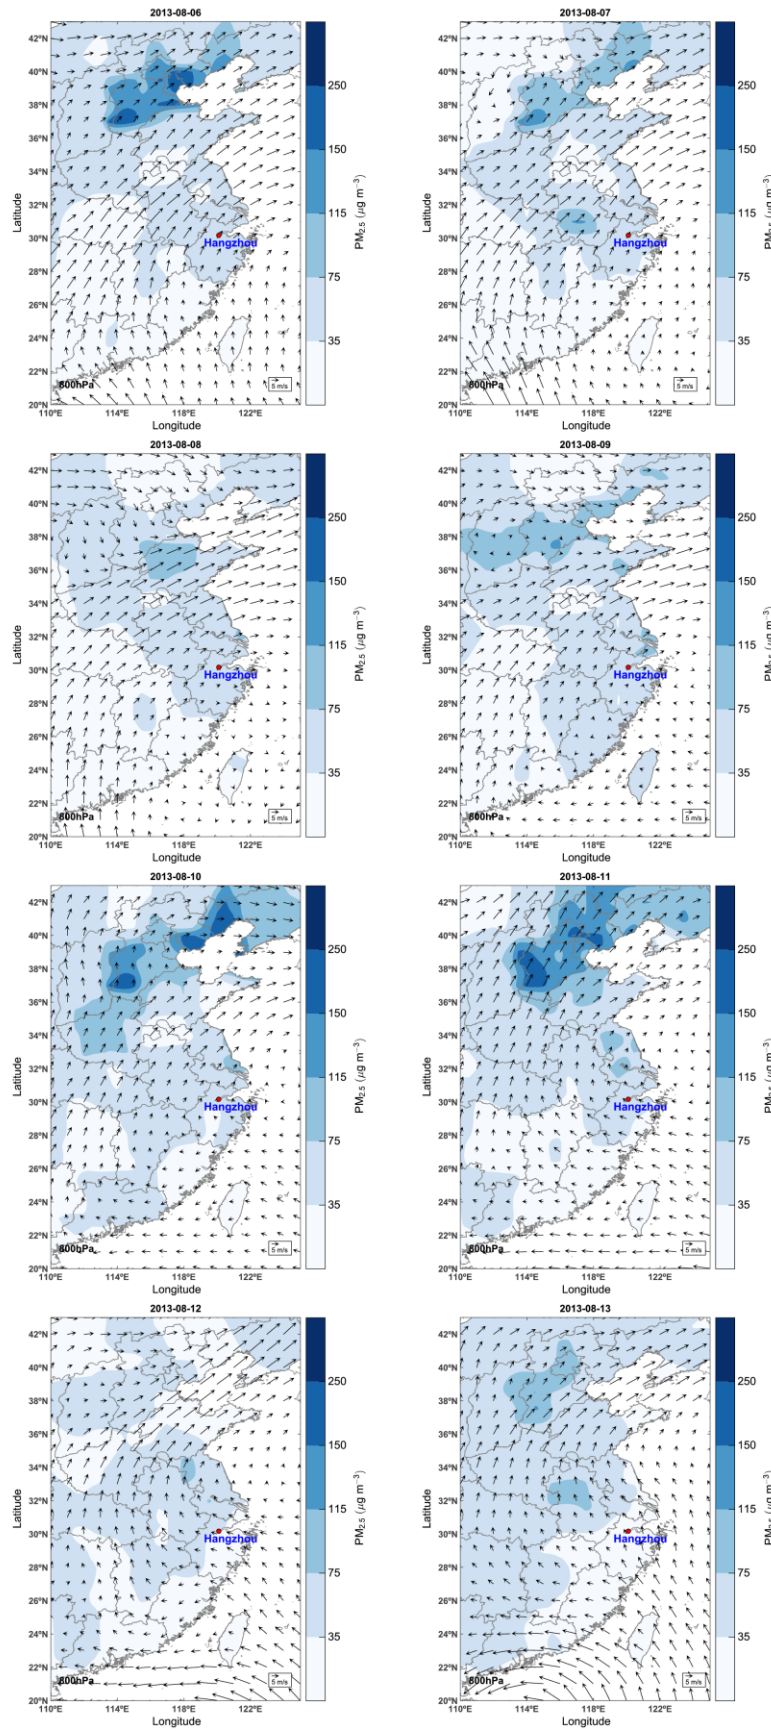

Figure S4. Daily averaged spatial distribution of PM<sub>2.5</sub> mass concentration and the wind field at 800hPa from ECMWF over eastern China, during 06-13 August, 2013.

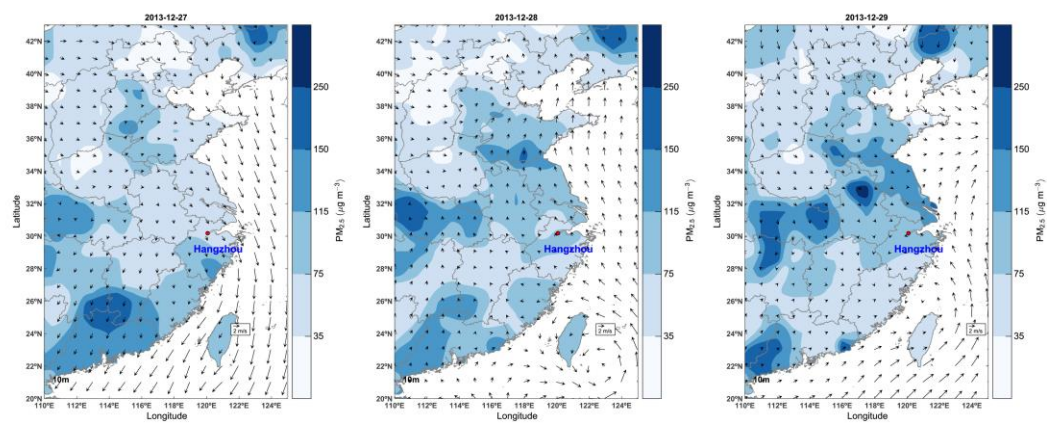

Figure S5. Spatial distribution of PM<sub>2.5</sub> and the wind field at 10m from ECMWF over eastern China, during 27-29 December, 2013.
